# Supplementary material for: Effects of Plastic Shed Cultivation System on the Properties of Red Paddy Soil and Its Management by Reductive Soil Disinfestation
Source: MDPI journal article supplement (doi:10.3390/horticulturae8040279), 2022-03-24
Supplement: s1 [file s1]

**Table S1.** Primers list.

| Primers | Sequence (5'–3')       | Protocols                 | Reference |
|---------|------------------------|---------------------------|-----------|
| Eub338  | CCTACGGGAGGCAGCAG      |                           | [48]      |
| Eub518  | ATTACCGCGGCTGCTGG      |                           | [49]      |
| Flic-F  | GAACGCCAACGGTGCGAACT   | 2 min at 95 °C,           | [50]      |
| Flic-R  | GGCGGCCTTCAGGGAGGTC    | followed by 40 cycles     | [50]      |
| ITS1f   | CTTGGTCATTTAGAGGAAGTAA | of 10 s at 95 °C, 20 s at | [51]      |
| ITS2R   | GCTGCGTTCTTCATCGATGC   | 53 °C and 30 s at 72 °C   | [52]      |
| ITS1f   | CTTGGTCATTTAGAGGAAGTAA |                           | [51]      |
| AFP346  | GGTATGTTACACAGGGTTGATG |                           | [53]      |
| ITS1f   | CTTGGTCATTTAGAGGAAGTAA | 2 min at 95 °C,           | [51]      |
|         |                        | followed by 40 cycles     |           |
| AFP308  | CGAATTAACGCGAGTCCCAAC  | of 10 s at 95 °C, 15 s at | [54]      |
|         |                        | 58 °C and 20 s at 72 °C   |           |

**Table S2.** Physicochemical properties of each PS–Soil and OA–Soil.

| Sampling site | Cultivation system | pH        | EC<br>( $\mu\text{S cm}^{-1}$ ) | $\text{NH}_4^+\text{-N}$<br>( $\text{mg kg}^{-1}$ ) | $\text{NO}_3^-\text{-N}$<br>( $\text{mg kg}^{-1}$ ) | TOC<br>( $\text{g kg}^{-1}$ ) | AK<br>( $\text{mg kg}^{-1}$ ) | AP<br>( $\text{mg kg}^{-1}$ ) | Moisture<br>(%) |
|---------------|--------------------|-----------|---------------------------------|-----------------------------------------------------|-----------------------------------------------------|-------------------------------|-------------------------------|-------------------------------|-----------------|
| Nanmiao       | PS –Soil           | 4.21±0.21 | 425.4±157.8                     | 16.44±8.87                                          | 155.0±63.3                                          | 37.07±4.77                    | 378.0±108.7                   | 82.28±18.56                   | 17.56±0.91      |
|               | OA–Soil            | 5.06±0.09 | 26.90±1.24                      | 3.40±3.15                                           | 1.40±1.00                                           | 40.67±39.66                   | 107.6±9.45                    | 10.14±3.05                    | 28.06±2.07      |
| Xicun         | PS –Soil           | 4.24±0.32 | 598.5±189.7                     | 9.63±8.67                                           | 214.7±68.9                                          | 34.99±3.85                    | 435.7±55.1                    | 50.99±5.71                    | 19.80±1.17      |
|               | OA–Soil            | 5.74±0.05 | 43.87±11.89                     | 2.50±0.15                                           | 3.43±1.19                                           | 36.61±11.37                   | 124.0±12.49                   | 18.21±4.46                    | 28.71±2.96      |
| Xinfang       | PS –Soil           | 6.88±0.22 | 405.8±184.9                     | 12.93±15.14                                         | 76.44±50.55                                         | 31.16±3.41                    | 418.3±118.0                   | 122.1±14.4                    | 22.28±2.95      |
|               | OA–Soil            | 5.09±0.49 | 82.31±28.63                     | 2.38±0.55                                           | 12.40±7.71                                          | 33.61±4.59                    | 164.3±61.0                    | 18.12±11.25                   | 25.19±1.33      |

Values: means ± standard deviations. EC: electrical conductivity; TOC: total organic carbon; AK: available potassium; AP: available phosphorus. PS–Soil and OA–Soil represent the plastic shed and open–air cultivation soils, respectively.

**Table S3.** Microbial properties of each PS–Soil and OA–Soil.

| Sampling site | Cultivation system | Microbial abundance<br>(log <sub>10</sub> 16S rDNA or ITS copies g <sup>-1</sup> soil) |           |                     |                  |                        | Microbial proportion (%) |                                  |                            |                         |
|---------------|--------------------|----------------------------------------------------------------------------------------|-----------|---------------------|------------------|------------------------|--------------------------|----------------------------------|----------------------------|-------------------------|
|               |                    | Bacteria                                                                               | Fungi     | <i>F. oxysporum</i> | <i>F. solani</i> | <i>R. solanacearum</i> | Fungi /bacteria          | <i>R. solanacearum</i> /bacteria | <i>F. oxysporum</i> /fungi | <i>F. solani</i> /fungi |
| Nanmiao       | PS–Soil            | 9.35±0.15                                                                              | 8.45±0.12 | 7.23±0.28           | 6.99±0.33        | 5.67±0.33              | 13.84±0.22               | 0.02±0.00                        | 6.82±2.83                  | 4.51±2.82               |
|               | OA–Soil            | 9.81±0.05                                                                              | 8.01±0.11 | 5.76±0.71           | 4.11±0.32        | 6.13±0.11              | 1.60±0.28                | 0.02±0.00                        | 1.13±1.53                  | 0.01±0.01               |
| Xicun         | PS–Soil            | 9.37±0.06                                                                              | 8.33±0.14 | 6.79±0.07           | 7.35±0.64        | 5.58±0.22              | 9.76±3.57                | 0.02±0.00                        | 3.17±1.51                  | 31.05±42.87             |
|               | OA–Soil            | 9.71±0.14                                                                              | 7.44±.27  | 5.20±0.45           | 5.47±0.31        | 5.85±0.09              | 0.55±0.09                | 0.01±0.01                        | 0.66±0.36                  | 1.19±0.59               |
| Xinfang       | PS–Soil            | 9.81±0.05                                                                              | 8.22±0.27 | 6.85±0.16           | 7.37±0.26        | 6.07±0.19              | 3.25±2.35                | 0.02±0.00                        | 4.66±1.82                  | 20.60±21.57             |
|               | OA–Soil            | 9.73±0.08                                                                              | 8.07±0.22 | 6.02±0.79           | 5.99±0.61        | 5.92±0.18              | 2.55±1.71                | 0.02±0.00                        | 2.21±1.87                  | 1.12±1.01               |

Values: means ± standard deviations. PS–Soil and OA–Soil represent the plastic shed and open air cultivation soils, respectively.

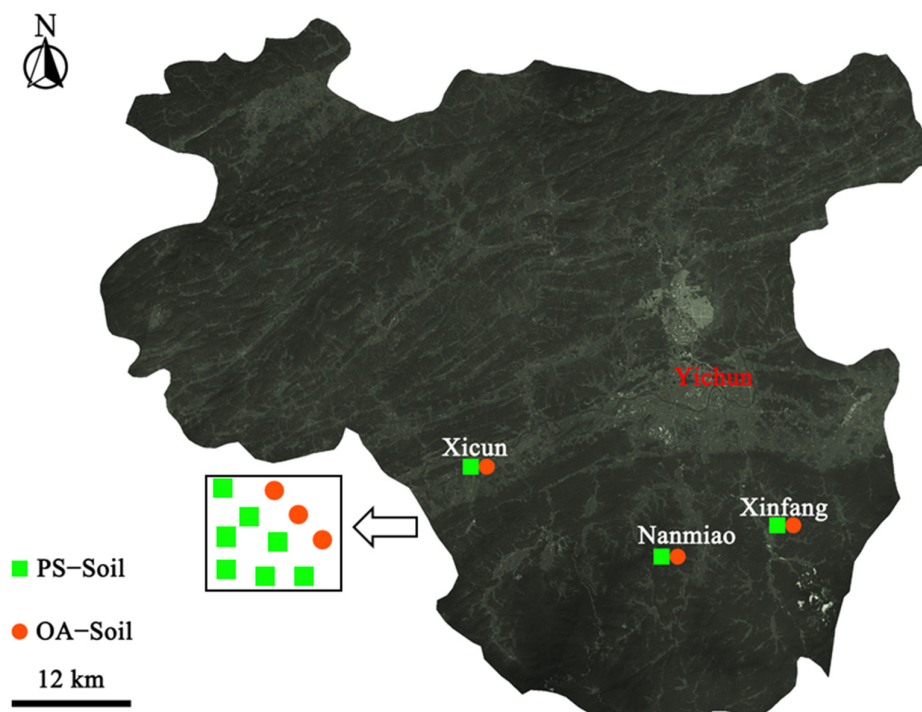

**Figure S1.** Map of soil sampling sites. PS-Soil and OA-Soil represent the plastic shed and open air cultivation soils, respectively.

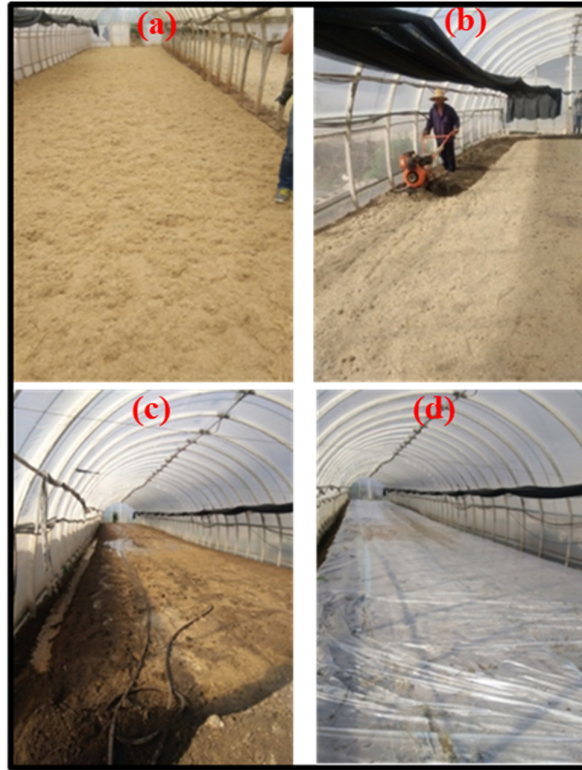

**Figure S2.** The operation processes of RSD treatment. (a) soil incorporated with organic material; (b) the fully mixed of soil and organic material using a rotary cultivator; (c) soil irrigated to saturation; and (d) soil covered with a plastic film. This illustration was taken from our previous RSD experiment rather than from this study, but it was not published anywhere.
